# Supplementary material for: Study on Precipitation Processes and Phase Transformation Kinetics of Iron Phosphate Dihydrate
Source: MDPI journal article supplement (doi:10.3390/cryst12101369), 2022-09-27
Supplement: s1 [file s1]

# **Supporting Information**

## **Study on Precipitation Processes and Phase Transformation Kinetics of Iron Phosphate Dihydrate**

**Huiqi Wang <sup>1</sup>, Mingxia Guo <sup>2</sup>, Yue Niu <sup>1</sup>, Jiayu Dai <sup>1</sup>, Qiuxiang Yin <sup>1,3</sup> and Ling Zhou <sup>1,\*</sup>**

**1** State Key Laboratory of Chemical Engineering, School of Chemical Engineering and Technology, Tianjin University, Tianjin 300072, China

**2** Department of Chemical Engineering, South Kensington Campus, Imperial College London, London SW7 2AZ, UK

**3** The Co-Innovation Center of Chemistry and Chemical Engineering of Tianjin, Tianjin University, Tianjin 300072, China

**\*** Correspondence: [zhouling@tju.edu.cn](mailto:zhouling@tju.edu.cn)

**Table S1.** The value of different parameter at pH range in equations.

|      | <b>a+b+c</b> | <b>10<sup>3</sup>•(A+B)</b> | <b>10<sup>2</sup>•(C+D)</b> | <b>10<sup>3</sup>•E</b> | <b>10<sup>3</sup>•F</b> | <b>10<sup>2</sup>•G</b> | <b>10<sup>4</sup>•H</b> |
|------|--------------|-----------------------------|-----------------------------|-------------------------|-------------------------|-------------------------|-------------------------|
| 1.3  | 0.15         | 15.00                       | 61.70                       | 33.10                   | 33.10                   | 120.00                  | 10700.00                |
| 1.25 | 0.13         | 12.00                       | 49.00                       | 26.30                   | 26.30                   | 85.00                   | 5366.67                 |
| 1.2  | 0.12         | 9.64                        | 38.90                       | 20.90                   | 20.90                   | 60.50                   | 2690.00                 |
| 1.05 | 0.09         | 4.98                        | 19.50                       | 10.50                   | 10.50                   | 21.40                   | 340.00                  |
| 0.95 | 0.07         | 3.23                        | 12.30                       | 6.61                    | 6.61                    | 10.70                   | 85.00                   |
| 0.85 | 0.05         | 2.10                        | 7.76                        | 4.17                    | 4.17                    | 5.35                    | 21.37                   |
| 0.8  | 0.05         | 1.70                        | 6.17                        | 3.31                    | 3.31                    | 3.80                    | 10.70                   |
| 0.75 | 0.04         | 1.38                        | 4.90                        | 2.63                    | 2.63                    | 2.69                    | 5.37                    |
| 0.7  | 0.04         | 1.12                        | 3.89                        | 2.09                    | 2.09                    | 1.91                    | 2.69                    |
| 0.65 | 0.03         | 0.91                        | 3.09                        | 1.66                    | 1.66                    | 1.35                    | 1.35                    |
| 0.6  | 0.03         | 0.74                        | 2.45                        | 1.32                    | 1.32                    | 0.96                    | 0.68                    |
| 0.55 | 0.03         | 0.61                        | 1.95                        | 1.05                    | 1.05                    | 0.68                    | 0.34                    |
| 0.5  | 0.02         | 0.50                        | 1.55                        | 0.83                    | 0.83                    | 0.48                    | 0.17                    |
| 0.4  | 0.02         | 0.34                        | 0.98                        | 0.52                    | 0.53                    | 0.24                    | 0.04                    |
| 0.35 | 0.02         | 0.28                        | 0.78                        | 0.42                    | 0.42                    | 0.17                    | 0.02                    |
| 0.3  | 0.02         | 0.23                        | 0.62                        | 0.33                    | 0.33                    | 0.12                    | 0.01                    |
| 0.25 | 0.01         | 0.19                        | 0.49                        | 0.26                    | 0.26                    | 0.09                    | 0.01                    |
| 0.2  | 0.01         | 0.16                        | 0.39                        | 0.21                    | 0.21                    | 0.06                    | 0.003                   |

**Table S2.** The concentration of different ions at pH range.

| <b>pH</b> | <b>c(H<sup>+</sup>)<br/>•10<sup>-3</sup><br/>/mol•L<sup>-1</sup></b> | <b>c(H<sub>2</sub>PO<sub>4</sub><sup>-</sup>)<br/>•10<sup>-3</sup><br/>/mol•L<sup>-1</sup></b> | <b>c(HPO<sub>4</sub><sup>2-</sup>)<br/>•10<sup>-10</sup><br/>/mol•L<sup>-1</sup></b> | <b>c(PO<sub>4</sub><sup>3-</sup>)<br/>•10<sup>-22</sup><br/>/mol•L<sup>-1</sup></b> | <b>c(Fe<sup>3+</sup>)<br/>•10<sup>3</sup><br/>/mol•L<sup>-1</sup></b> | <b>c(H<sub>3</sub>PO<sub>4</sub>)<br/>•10<sup>3</sup><br/>/mol•L<sup>-1</sup></b> |
|-----------|----------------------------------------------------------------------|------------------------------------------------------------------------------------------------|--------------------------------------------------------------------------------------|-------------------------------------------------------------------------------------|-----------------------------------------------------------------------|-----------------------------------------------------------------------------------|
| 1.30      | 0.15                                                                 | 3.17                                                                                           | 40.00                                                                                | 348.00                                                                              | 7.72                                                                  | 7.20                                                                              |
| 1.25      | 0.16                                                                 | 2.98                                                                                           | 33.50                                                                                | 260.00                                                                              | 8.81                                                                  | 7.72                                                                              |
| 1.20      | 0.18                                                                 | 2.86                                                                                           | 28.60                                                                                | 198.00                                                                              | 9.83                                                                  | 8.45                                                                              |
| 1.05      | 0.23                                                                 | 2.43                                                                                           | 17.20                                                                                | 84.30                                                                               | 13.65                                                                 | 10.86                                                                             |
| 0.95      | 0.28                                                                 | 2.18                                                                                           | 12.20                                                                                | 47.60                                                                               | 16.52                                                                 | 12.93                                                                             |
| 0.85      | 0.33                                                                 | 1.93                                                                                           | 8.61                                                                                 | 26.60                                                                               | 19.56                                                                 | 15.47                                                                             |
| 0.80      | 0.35                                                                 | 1.80                                                                                           | 7.17                                                                                 | 19.70                                                                               | 21.23                                                                 | 16.83                                                                             |
| 0.75      | 0.38                                                                 | 1.68                                                                                           | 5.97                                                                                 | 14.70                                                                               | 22.81                                                                 | 18.39                                                                             |
| 0.70      | 0.41                                                                 | 1.56                                                                                           | 4.93                                                                                 | 10.80                                                                               | 24.47                                                                 | 20.01                                                                             |
| 0.65      | 0.44                                                                 | 1.45                                                                                           | 4.08                                                                                 | 7.96                                                                                | 25.99                                                                 | 21.86                                                                             |
| 0.60      | 0.47                                                                 | 1.33                                                                                           | 3.35                                                                                 | 5.82                                                                                | 27.58                                                                 | 23.75                                                                             |
| 0.55      | 0.50                                                                 | 1.22                                                                                           | 2.73                                                                                 | 4.23                                                                                | 29.13                                                                 | 25.75                                                                             |
| 0.50      | 0.53                                                                 | 1.12                                                                                           | 2.23                                                                                 | 3.08                                                                                | 30.41                                                                 | 28.09                                                                             |
| 0.40      | 0.58                                                                 | 0.92                                                                                           | 1.46                                                                                 | 1.60                                                                                | 32.9                                                                  | 32.92                                                                             |
| 0.35      | 0.61                                                                 | 0.83                                                                                           | 1.17                                                                                 | 1.14                                                                                | 33.95                                                                 | 35.58                                                                             |
| 0.30      | 0.64                                                                 | 0.74                                                                                           | 0.93                                                                                 | 0.81                                                                                | 34.85                                                                 | 38.41                                                                             |
| 0.25      | 0.66                                                                 | 0.66                                                                                           | 0.74                                                                                 | 0.58                                                                                | 35.42                                                                 | 41.60                                                                             |
| 0.20      | 0.69                                                                 | 0.59                                                                                           | 0.59                                                                                 | 0.41                                                                                | 35.94                                                                 | 44.63                                                                             |

**Table S3.** The concentration of different ions at pH range.

| pH   | $c(\text{H}_3\text{PO}_4)$<br>$\cdot 10^{-3}$<br>/mol $\cdot\text{L}^{-1}$ | $c(\text{FeHPO}_4^+)$<br>$\cdot 10^{-2}$<br>/mol $\cdot\text{L}^{-1}$ | $c(\text{FeH}_2\text{PO}_4^{2+})$<br>$\cdot 10^{-2}$<br>/mol $\cdot\text{L}^{-1}$ | $c(\text{FeH}_2(\text{PO}_4)_2^-)$<br>$\cdot 10^{-7}$<br>/mol $\cdot\text{L}^{-1}$ | $c(\text{FeH}_4(\text{PO}_4)_2^+)$<br>$\cdot 10^{-3}$<br>/mol $\cdot\text{L}^{-1}$ |
|------|----------------------------------------------------------------------------|-----------------------------------------------------------------------|-----------------------------------------------------------------------------------|------------------------------------------------------------------------------------|------------------------------------------------------------------------------------|
| 1.30 | 7.20                                                                       | 78.49                                                                 | 5.07                                                                              | 29.00                                                                              | 2.47                                                                               |
| 1.25 | 7.72                                                                       | 76.36                                                                 | 5.53                                                                              | 24.00                                                                              | 2.57                                                                               |
| 1.20 | 8.45                                                                       | 74.04                                                                 | 6.02                                                                              | 20.20                                                                              | 2.73                                                                               |
| 1.05 | 10.86                                                                      | 66.20                                                                 | 7.60                                                                              | 11.70                                                                              | 3.14                                                                               |
| 0.95 | 12.93                                                                      | 60.20                                                                 | 8.70                                                                              | 7.96                                                                               | 3.40                                                                               |
| 0.85 | 15.47                                                                      | 53.82                                                                 | 9.79                                                                              | 5.38                                                                               | 3.63                                                                               |
| 0.80 | 16.83                                                                      | 50.46                                                                 | 10.30                                                                             | 4.36                                                                               | 3.71                                                                               |
| 0.75 | 18.39                                                                      | 47.05                                                                 | 10.78                                                                             | 3.52                                                                               | 3.78                                                                               |
| 0.70 | 20.01                                                                      | 43.63                                                                 | 11.22                                                                             | 2.82                                                                               | 3.81                                                                               |
| 0.65 | 21.86                                                                      | 40.22                                                                 | 11.60                                                                             | 2.26                                                                               | 3.84                                                                               |
| 0.60 | 23.75                                                                      | 36.84                                                                 | 11.92                                                                             | 1.79                                                                               | 3.82                                                                               |
| 0.55 | 25.75                                                                      | 33.51                                                                 | 12.17                                                                             | 1.40                                                                               | 3.77                                                                               |
| 0.50 | 28.09                                                                      | 30.31                                                                 | 12.35                                                                             | 1.10                                                                               | 3.72                                                                               |
| 0.40 | 32.92                                                                      | 24.25                                                                 | 12.43                                                                             | 0.65                                                                               | 3.48                                                                               |
| 0.35 | 35.58                                                                      | 21.49                                                                 | 12.36                                                                             | 0.49                                                                               | 3.34                                                                               |
| 0.30 | 38.41                                                                      | 18.91                                                                 | 12.21                                                                             | 0.37                                                                               | 3.17                                                                               |
| 0.25 | 41.60                                                                      | 16.53                                                                 | 11.98                                                                             | 0.28                                                                               | 3.00                                                                               |
| 0.20 | 44.63                                                                      | 14.30                                                                 | 11.62                                                                             | 0.21                                                                               | 2.78                                                                               |

**Table S4.** The concentration of different ions at pH range.

| pH   | $c(\text{FeH}_8(\text{PO}_4)_4^-)$<br>$\cdot 10^{-4}$<br>/mol $\cdot\text{L}^{-1}$ | $c(\text{Fe}_2\text{HPO}_4^{4+})$<br>$\cdot 10^{-3}$<br>/mol $\cdot\text{L}^{-1}$ | $c(\text{Fe}_2\text{H}_3(\text{PO}_4)_2^{3+})$<br>$\cdot 10^{-5}$<br>/mol $\cdot\text{L}^{-1}$ | $c(\text{Fe}_3\text{H}_6(\text{PO}_4)_4^{3+})$<br>$\cdot 10^{-8}$<br>/mol $\cdot\text{L}^{-1}$ |
|------|------------------------------------------------------------------------------------|-----------------------------------------------------------------------------------|------------------------------------------------------------------------------------------------|------------------------------------------------------------------------------------------------|
| 1.30 | 1.77                                                                               | 4.88                                                                              | 1.27                                                                                           | 1.56                                                                                           |
| 1.25 | 1.68                                                                               | 5.51                                                                              | 1.38                                                                                           | 1.59                                                                                           |
| 1.20 | 1.70                                                                               | 6.06                                                                              | 1.48                                                                                           | 1.64                                                                                           |
| 1.05 | 1.61                                                                               | 8.05                                                                              | 1.78                                                                                           | 1.73                                                                                           |
| 0.95 | 1.56                                                                               | 9.36                                                                              | 1.96                                                                                           | 1.73                                                                                           |
| 0.85 | 1.51                                                                               | 10.63                                                                             | 2.12                                                                                           | 1.70                                                                                           |
| 0.80 | 1.45                                                                               | 11.24                                                                             | 2.17                                                                                           | 1.65                                                                                           |
| 0.75 | 1.40                                                                               | 11.72                                                                             | 2.21                                                                                           | 1.58                                                                                           |
| 0.70 | 1.33                                                                               | 12.20                                                                             | 2.23                                                                                           | 1.50                                                                                           |
| 0.65 | 1.27                                                                               | 12.53                                                                             | 2.23                                                                                           | 1.41                                                                                           |
| 0.60 | 1.18                                                                               | 12.81                                                                             | 2.21                                                                                           | 1.31                                                                                           |
| 0.55 | 1.09                                                                               | 13.00                                                                             | 2.16                                                                                           | 1.19                                                                                           |
| 0.50 | 1.02                                                                               | 13.02                                                                             | 2.10                                                                                           | 1.08                                                                                           |
| 0.40 | 0.83                                                                               | 12.77                                                                             | 1.92                                                                                           | 0.83                                                                                           |
| 0.35 | 0.73                                                                               | 12.51                                                                             | 1.81                                                                                           | 0.72                                                                                           |
| 0.30 | 0.65                                                                               | 12.14                                                                             | 1.69                                                                                           | 0.61                                                                                           |

|      |      |       |      |      |
|------|------|-------|------|------|
| 0.25 | 0.57 | 11.62 | 1.56 | 0.51 |
| 0.20 | 0.48 | 11.01 | 1.42 | 0.41 |

**Table S5.** The content of S and O in precipitation at different time.

| Sampling time/min | S (atom %) | O (atom %) |
|-------------------|------------|------------|
| 0                 | 2.32       | 61.90      |
| 100               | 2.42       | 60.28      |
| 320               | 0.84       | 56.49      |

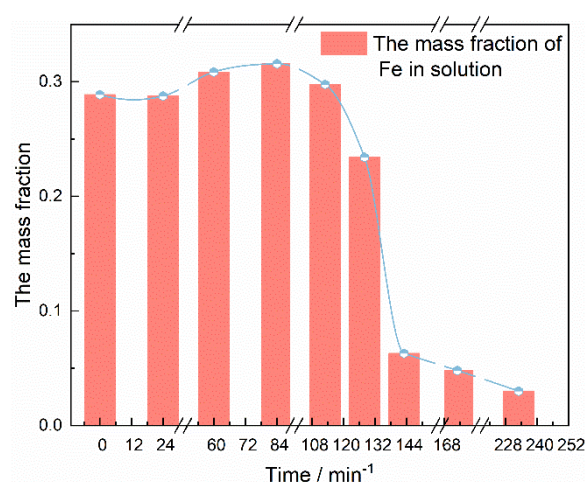

**Figure S1.** The mass fraction trend of Fe in solution at different time.

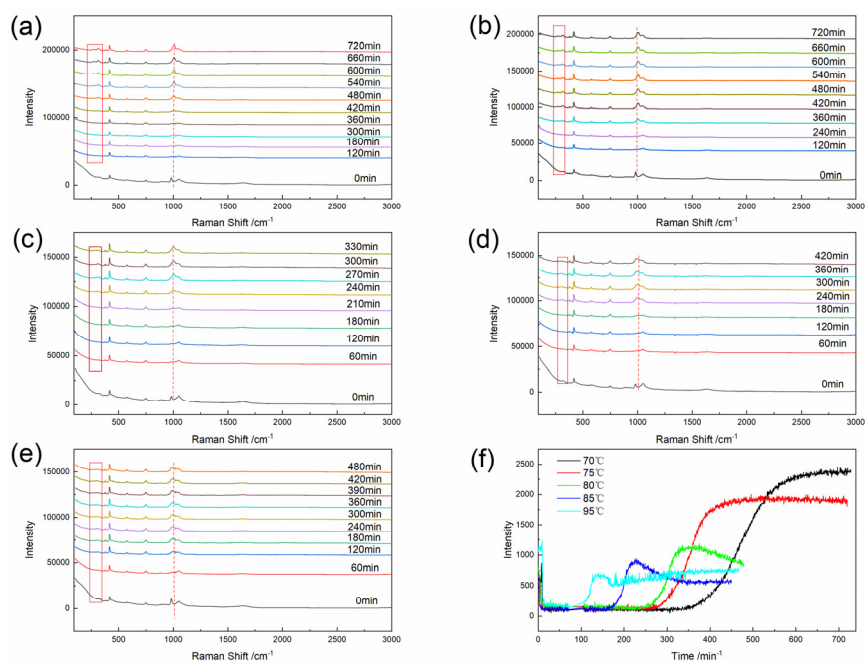

**Figure S2.** Raman spectra of the precipitates at 70 °C (a), 75 °C (b), 80 °C (c), 85 °C (d), 95 °C (e); (f) the change of characteristic peak at 303  $\text{cm}^{-1}$  over time under different temperature.

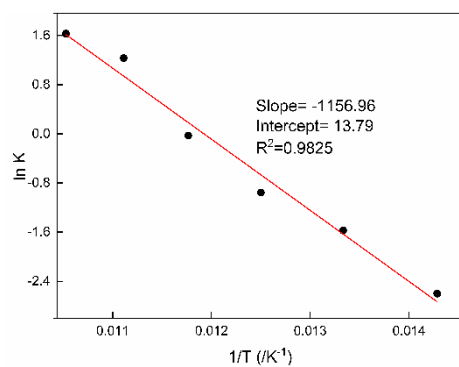

**Figure S3.** The linear relationship between  $\ln K$  and  $(1/T)$ .
